# Supplementary material
Source: publisher figshare collection journal article supplement (https://karger.figshare.com/ndownloader/files/30642930)
Supplement: Supplementary file 1 [file 30642930]

## Sheet: All n = 100
ID	FNAV 0 = No 1 = Yes	45D 0 = Unchecked 1 = Checked	90D 0 = Unchecked 1 = Checked	180D 0 = Unchecked 1 = Checked	USG 0 = No view 1 = Eccentric 2 = Concentric	SL2 0 = No 1 = Yes	SG2 0 = No 1 = Yes	SSIZ	LUNL 0 = RUL 1 = RML 3 = RLL 4 = LUL Proper 5 = Lingula 6 = LLL	PAB 0 = No 1 = Yes	CEN 0 = No 1 = Yes	PER 0 = No 1 = Yes	ABR 0 = No 1 = Yes	LEC 0 = No 1 = Yes	DIAG 0 = No 1 = Yes
1	1	0	1	0	2	1	0	2	0	1	0	1	0	0	1
2	0	0	1	0	2	0	1	3.5	4	0	0	1	1	0	1
3	0	0	1	0	2	0	1	4.3	3	0	1	0	1	0	1
4	1	0	1	0	1	0	1	1.1	3	0	1	0	1	0	1
5	1	0	1	0	0	1	0	1	0	0	0	1	0	0	0
6	1	0	1	0	1	1	0	1.2	1	1	0	1	0	0	1
7	1	0	0	1	2	1	0	0.7	4	0	0	1	0	0	1
8	1	0	1	0	1	1	0	0.7	6	0	1	0	1	0	1
9	1	0	1	0	2	0	1	4.2	3	1	0	1	0	0	1
10	1	1	0	0	1	1	0	0.91	1	1	0	1	1	0	1
11	1	0	1	0	2	0	1	2.34	3	0	1	0	1	0	1
12	1	0	1	0	1	0	1	2.6	4	0	1	0	0	0	1
13	1	0	1	0	2	0	1	2.2	1	0	1	0	0	0	1
14	1	0	1	0	1	1	0	1	0	0	0	1	0	0	0
15	1	0	1	0	1	1	0	1.9	1	0	0	1	0	0	1
16	0	0	0	1	1	1	0	1	3	0	1	0	1	0	0
17	1	0	1	0	1	1	0	1.1	6	0	0	1	0	0	1
18	1	0	1	0	1	1	0	1.27	0	0	0	1	0	0	1
19	1	0	1	0	1	0	1	3.69	0	0	1	0	1	0	1
20	1	0	1	0	1	1	0	1.61	5	0	1	0	0	1	1
21	1	0	0	1	2	1	0	2.2	0	1	0	1	0	0	1
22	1	0	0	1	2	1	0	1.7	5	1	0	1	0	0	0
23	1	0	0	1	0	1	0	1.9	3	1	0	1	0	0	0
24	1	0	0	1	1	1	0	0.8	4	0	1	0	1	0	1
25	1	0	1	0	2	1	0	1.8	0	0	1	0	1	0	1
26	1	0	1	0	1	1	0	0.83	4	1	0	1	0	0	1
27	1	0	1	0	1	1	0	1.7	5	0	0	1	0	0	1
28	1	0	1	0	2	0	1	2.4	1	0	1	0	0	0	1
29	1	0	1	0	1	0	1	2.21	0	1	0	1	0	1	1
30	1	0	1	0	2	0	1	2.2	5	0	0	1	0	0	1
31	1	1	0	0	1	0	1	4.2	4	1	0	1	1	0	1
32	1	0	1	0	1	1	0	1.05	1	0	0	1	0	0	1
33	1	0	1	0	1	0	1	3.5	3	1	0	1	0	0	0
34	0	0	0	1	2	0	1	2.14	4	0	1	0	0	0	0
35	0	0	1	0	0	0	1	3.9	0	0	1	0	0	0	0
36	0	0	1	0	1	0	1	3.71	0	0	1	0	1	0	0
37	1	0	1	0	1	0	1	2.1	3	0	0	1	1	0	1
38	1	0	1	0	1	0	1	2.86	6	0	0	1	0	0	1
39	1	0	1	0	1	0	1	2.3	4	1	0	1	1	0	1
40	1	0	1	0	1	0	1	2.32	0	0	1	0	1	0	1
41	1	0	1	0	1	1	0	1.6	6	0	1	0	0	0	1
42	1	0	1	0	2	1	0	1.96	6	1	0	1	1	0	1
43	1	0	1	0	1	0	1	2.9	4	0	1	0	0	0	1
44	1	0	1	0	2	0	1	3.9	0	0	0	1	1	0	1
45	1	0	1	0	1	0	1	2.4	0	0	1	0	0	1	0
46	1	0	1	0	0	0	1	2.54	4	0	1	0	1	1	1
47	1	0	1	0	0	0	1	4.5	0	0	1	0	0	1	1
48	1	0	0	1	1	1	0	0.9	4	0	0	1	0	0	1
49	1	0	1	0	1	1	0	0.88	5	1	0	1	0	0	1
50	1	0	1	0	2	1	0	1.31	6	0	1	0	0	0	1
51	1	0	1	0	1	0	1	3.78	4	1	0	1	1	0	1
52	1	0	1	0	1	0	1	9.5	0	0	1	0	1	0	1
53	1	0	1	0	1	1	0	1.51	3	0	0	1	0	1	1
54	1	0	1	0	1	0	1	3.04	3	0	0	1	0	1	0
55	1	0	1	0	1	1	0	1.76	6	0	1	0	0	0	1
56	1	0	1	0	2	1	0	0.76	4	0	0	1	0	0	1
57	1	0	1	0	2	0	1	6.94	6	1	0	1	1	1	1
58	1	0	1	0	1	1	0	1.3	6	0	0	1	0	0	1
59	1	0	0	1	1	1	0	0.8	0	0	1	0	0	0	1
60	1	0	1	0	2	0	1	3.8	0	0	1	0	1	0	1
61	0	0	1	0	2	0	1	2.14	4	0	1	0	1	0	1
62	1	1	0	0	1	1	0	1.4	0	0	1	0	1	0	0
63	1	0	1	0	1	1	0	1	3	0	1	0	0	0	1
64	0	0	0	1	1	0	1	2.5	1	0	1	0	1	0	1
65	1	0	1	0	0	1	0	0.8	0	0	0	1	0	0	0
66	1	0	1	0	2	0	1	3.6	3	1	0	1	1	0	1
67	1	0	1	0	1	0	1	2.13	3	0	0	1	0	0	1
68	0	0	1	0	2	0	1	3.7	0	0	1	0	1	0	1
69	1	0	0	1	1	1	0	1.1	3	0	1	0	0	0	1
70	1	0	0	1	2	0	1	2.4	0	0	1	0	1	0	1
71	0	0	1	0	2	0	1	5.8	3	0	1	0	0	0	1
72	1	0	1	0	1	1	0	1.8	6	0	0	1	0	0	1
73	1	0	1	0	1	1	0	1	0	0	0	1	0	1	1
74	1	0	1	0	1	1	0	1.9	0	0	1	0	0	1	0
75	1	0	0	1	2	0	1	3	3	0	0	1	0	0	1
76	1	0	0	1	2	0	1	2.3	4	0	1	0	1	0	1
77	1	0	0	1	1	1	0	1.1	0	0	1	0	0	0	1
78	1	0	0	1	1	1	0	1.2	3	0	0	1	0	1	0
79	1	0	0	1	0	0	1	2.1	1	1	0	1	0	1	0
80	1	0	0	1	0	1	0	1.8	1	0	0	1	0	1	1
81	1	0	0	1	1	0	1	3.3	6	0	1	0	1	0	1
82	1	0	0	1	0	1	0	2.1	6	0	0	1	0	0	1
83	1	0	1	0	1	1	0	0.91	3	0	1	0	0	0	1
84	1	0	1	0	1	1	0	1.2	3	0	1	0	0	0	1
85	1	0	1	0	0	1	0	1.9	0	0	1	0	0	1	0
86	1	0	0	1	1	1	0	1.1	0	0	1	0	0	0	1
87	0	1	0	0	2	0	1	5.4	6	1	0	1	1	1	1
88	1	0	1	0	2	1	0	1.7	1	0	0	1	0	0	1
89	1	0	1	0	0	1	0	1.32	3	0	0	1	1	1	1
90	1	0	1	0	1	1	0	0.8	6	0	1	0	0	0	1
91	1	0	1	0	2	1	0	1.5	4	0	1	0	0	0	1
92	1	0	1	0	2	1	0	1.4	6	0	0	1	0	0	1
93	0	0	1	0	2	0	1	4.9	3	1	0	1	0	1	1
94	1	0	1	0	0	0	1	2.1	4	1	0	1	0	0	0
95	0	0	1	0	1	0	1	2.5	0	0	1	0	0	1	1
96	0	0	1	0	2	0	1	3.8	0	1	0	1	1	0	0
97	1	0	1	0	1	0	1	3.6	1	0	0	1	0	1	1
98	0	0	1	0	0	0	1	5	4	0	1	0	1	1	0
99	0	1	0	0	2	0	1	4	6	1	0	1	1	0	1
100	0	0	1	1	0	1	0	1.5	0	0	1	0	1	0	0
